# Supplementary material
Source: PubMed Central journal article supplement (PMC1276036)
Supplement: plntcell_tpc.105.034678_2.pdf [file plntcell_tpc.105.034678_2.pdf]

**Supplemental Table 2. Pro-region in cyclotide precursors from Violaceae.**

---

*Cyclotide Pro-region including N-Terminal repeat (NTR)*

*precursor*

---

|               |                                                                   |
|---------------|-------------------------------------------------------------------|
| <i>Voc1</i>   | NFE-KDFITHETVQAILK-KVGPSSNGMLDEQTISAL--TGKTIISNPVLEEALLTHSNSINALG |
| <i>Voc2</i>   | SFE-KDFITHETVQAILK-KVGPSSNGMLDEQAISAL--TGKTIISNPVLEEALLTHSNSINALG |
| <i>Voc3</i>   | -FE-KDFITPETIQAILK-KSAPLSNIMLEEDVINALL-KSKTVISNPIIEEAFLK--NS-NGLN |
| <i>Vok1-1</i> | -TE-QDVITL---QAYEELLKNGAANGMT-----KTVISSPVLEEALV--SYSKNKLG        |
| <i>Vok1-2</i> | -----NPLLEEAL-TAFACK-GLG                                          |
| <i>Vok1-3</i> | -----HLLEEAL-VAFAKKGNLG                                           |
| Tricyclon A   | SLETKDVITRA---AYEKLVES-----GAIQGITM--TKTIISNPILEEALVAHFNRK--LG    |
| Tricyclon B   | SLE KDVITRAA--AYENLVNS-----GAIQGITM--TKTIISNPILEEALVSHFNRK--LG    |
| Hyfl D        | TLEKDVITPKAIELILKKTNTPLSNIMLEEDALVNAFV-KSKTMISNTVFDEALL-KHSNH-GLG |
| Hyfl E        | SFEKDVITPRG-----LEEDTMSAL-V-KTKTLISDTVFD-ILL-KN-YH-TNG            |
| Hyfl I        | TLEKDVITPETIQAVLKKTGSPLSNIMLEEDVINA-MV-KSKTVISKTVLDEALL-KH---DGLG |
| Hyfl J        | SFEKDIITPKAIQHLK-----ADGDALNAILKTKTLISDTVY-EALVLKNS---VN          |
| Hyfl K        | TLEKDVITPKAIELILKKTNTPLSNITLQDDALVNALV-KSKTMISNTVFEEALL-KHSNH-GLG |
| Hyfl L        | TLEKDVITPKAIELILKKTNSPLSNIMLQEDALLNSLV-KTKTMISNTVFEEALL-KHSHH-GLG |
| Hyfl M        | SFEKDVITPRGIELMLKKTNFPLSNIMLEEDTMSA-LV-KTKTLISDTVFD-ALL-KNS-H-TNG |

---

Footnote to Supplemental Table 2.

The *Voc1-3* precursors are processed to produce the cyclotides cycloviolacin O8, O11, and O2, respectively. The *Vok1* precursor gene contains three NTR-regions, each followed by a cyclotide, namely kalata B1, kalata S, and kalata B1, respectively. In the Tricyclon precursor gene, which encodes Tricyclon A and B, the N-terminal repeat comprises the entire pro-region.
